# Supplementary material
Source: PubMed Central journal article supplement (PMC4334103)
Supplement: Supp_Figure1.pdf [file Supp_Figure1.pdf]

## Supplementary Data

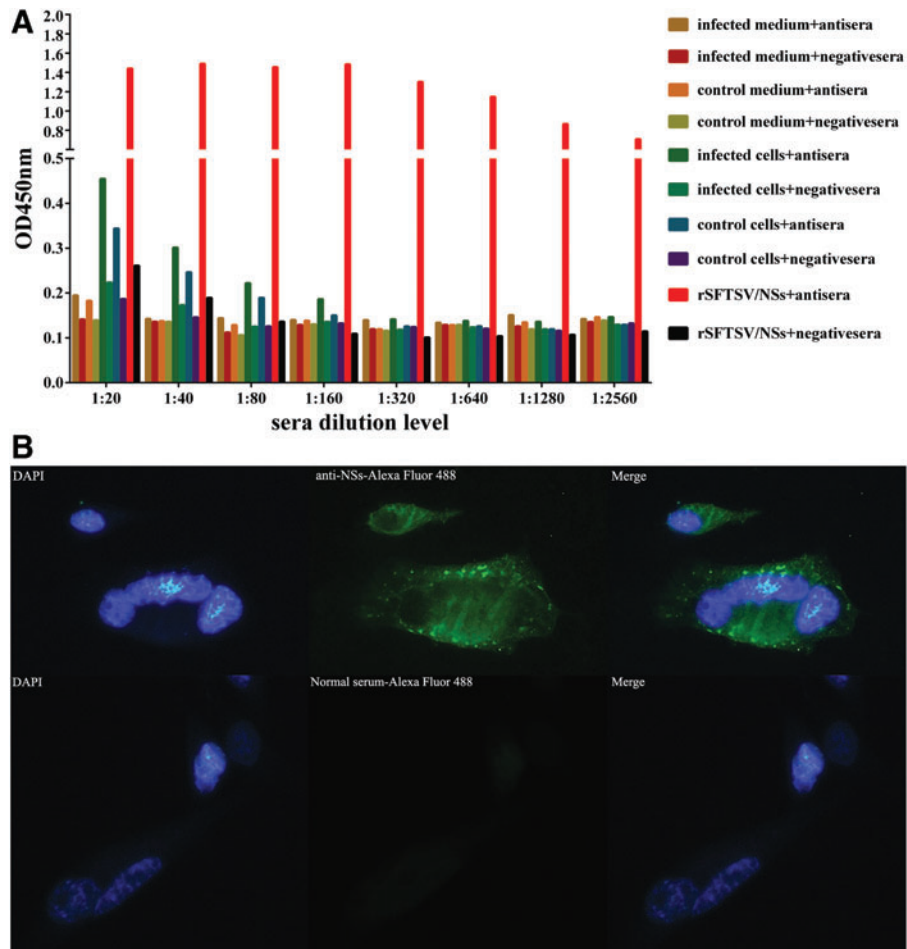

**SUPPLEMENTARY FIG. S1.** SFTSV/NSs was located within the infected cell instead of secreted into the extracellular by ELISA (**A**) and immunocytofluorescence assay (**B**). For ELISA detection, SFTSV was inoculated to cultured DH82 cells, and then the culture medium and the cells (washed with PBS solution and lysed with 1% SDS) were collected separately after 3 days and used to coat 96-well ELISA plates. Simultaneously, some cultured DH82 cells without SFTSV inoculation and the culture medium were used as the controls (**A**). In addition, some infected cells were washed twice with PBS and fixed with 4% formaldehyde solution for 30 min. Cells were blocked with 5% bovine serum albumin in washing solution for 30 min at 37°C and then incubated with 1:100 dilution of mouse antisera against SFTSV/NSs or normal sera 4°C overnight. After three washes, bound antibodies were detected by 1:1,000 dilution of Alexa Fluor 488-conjugated goat anti-mouse IgG (H+L) (Abcam) at 37°C for 60 min, then washed and stained with DAPI for 10 min, and visualized under a fluorescence microscope (**B**). ELISA, enzyme-linked immunosorbent assay; SFTSV, severe fever with thrombocytopenia syndrome virus; SFTSV/NSs, SFTSV nonstructural protein in S segment.
